# Supplementary figures and images for: Electroconvulsive therapy, catatonia, deep vein thrombosis and anticoagulant treatment: a case report
Source: HighWire-hosted journal article supplement (doi:10.1136/gpsych-2021-100666), 2021-12-01

**Supplementary Material 1:**

**CRANIAL CT:**

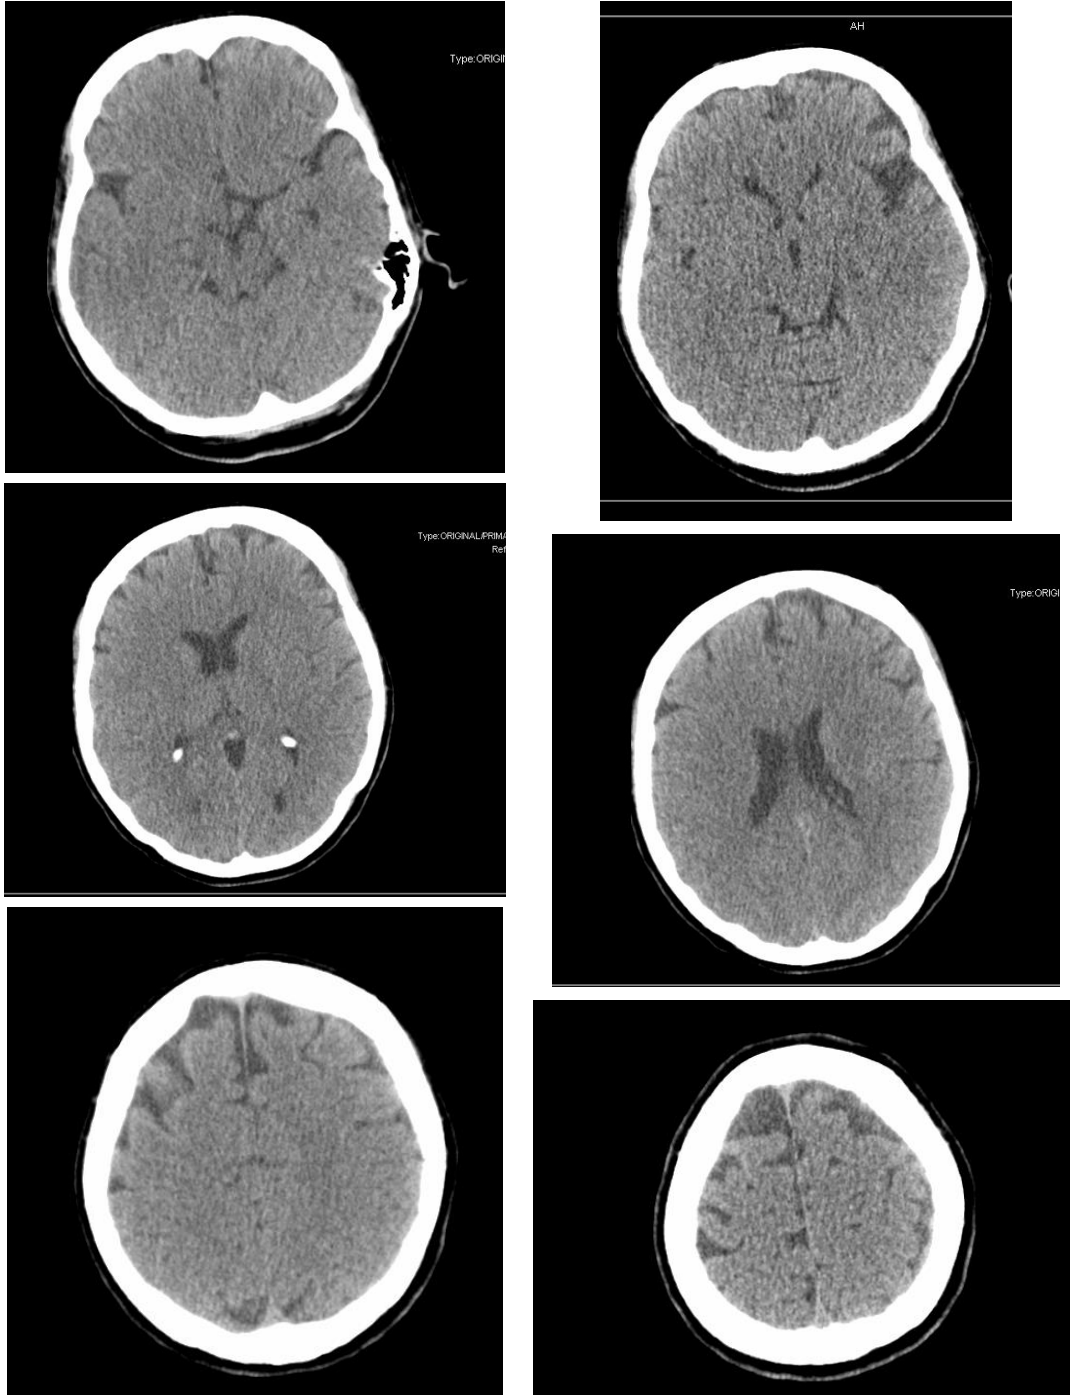

**CRANIAL MRI:**

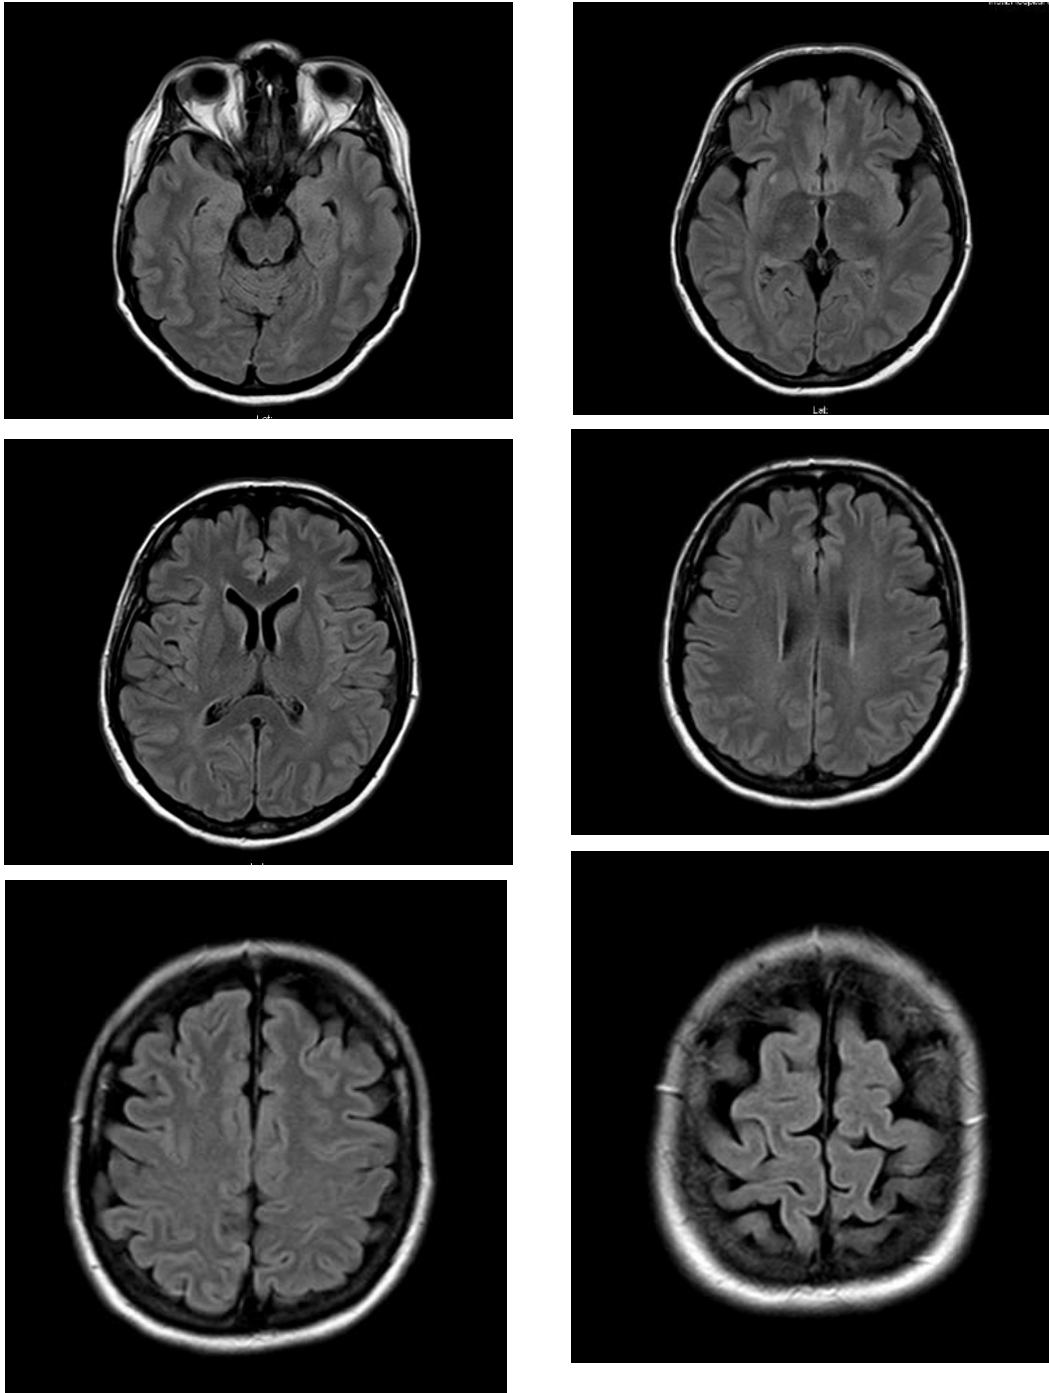

Supplement: gpsych-2021-100666supp001_data_supplement.pdf [file gpsych-2021-100666supp001_data_supplement.pdf]
